# Supplementary material for: Reinforcement using undoped carbon quantum dots (CQDs) with a partially carbonized structure doubles the toughness of PVA membranes
Source: Royal Society of Chemistry journal article supplement (doi:10.1039/d3na01143g), 2024-01-01
Supplement: d3na01143g1.pdf [file d3na01143g1.pdf]

## Supporting Information

### Un-doped carbon quantum dots (CQDs) reinforcement having partially carbonized structure doubles the toughness of PVA membranes

Zeeshan Latif<sup>1</sup>, Hasan B. Albargi<sup>2,3</sup>, Zubair Khaliq<sup>1</sup>, Kinza Shahid<sup>1</sup>, Usama Khalid<sup>1</sup>, Muhammad Bilal Qadir<sup>4\*</sup>, Mumtaz Ali<sup>4\*</sup>, Salman Noshear Arshad<sup>5</sup>, Ali S. Alkorbi<sup>6</sup>, Mohammed Jalalah<sup>3,7\*</sup>

<sup>1</sup> Department of Materials, School of Engineering and Technology, National Textile University, Faisalabad 37610, Pakistan. Z.L. (zeeshanlatif203@yahoo.com); Z.K. (zubntu@yahoo.com); K.S. (kinzashahid1560@gmail.com); U.K. (usamakhalidqurashi@gmail.com)

<sup>2</sup> Department of Physics, Faculty of Science and Arts, Najran University, Najran 11001, Saudi Arabia. H.B.A. (hbalbargi@nu.edu.sa)

<sup>3</sup> Advanced Materials and Nano-Research Centre (AMNRC), Najran University, Najran 11001, Saudi Arabia. M.J. (msjalalah@nu.edu.sa)

<sup>4</sup> Department of Textile Engineering, School of Engineering and Technology, National Textile University, Faisalabad 37610, Pakistan. M.B.Q (bilal\_ntu81@hotmail.com) ; M.A. (mumtaz.ali@ntu.edu.pk)

<sup>5</sup> Department of Chemistry and Chemical Engineering, Lahore University of Management Sciences, Lahore, 54792, Pakistan. S.N.A. (salman.arshad@lums.edu.pk)

<sup>6</sup> Department of Chemistry, Faculty of Science and Arts at Sharurah, Najran University, Sharurah 68342, Saudi Arabia. A.S.A. (assalem@nu.edu.sa)

<sup>7</sup> Department of Electrical Engineering, College of Engineering, Najran University, Najran 11001, Saudi Arabia

#### Corresponding Authors:

Muhammad Bilal Qadir (bilal\_ntu81@hotmail.com),

Mumtaz Ali (mumtaz.ali@ntu.edu.pk)

Mohammed Jalalah (msjalalah@nu.edu.sa)

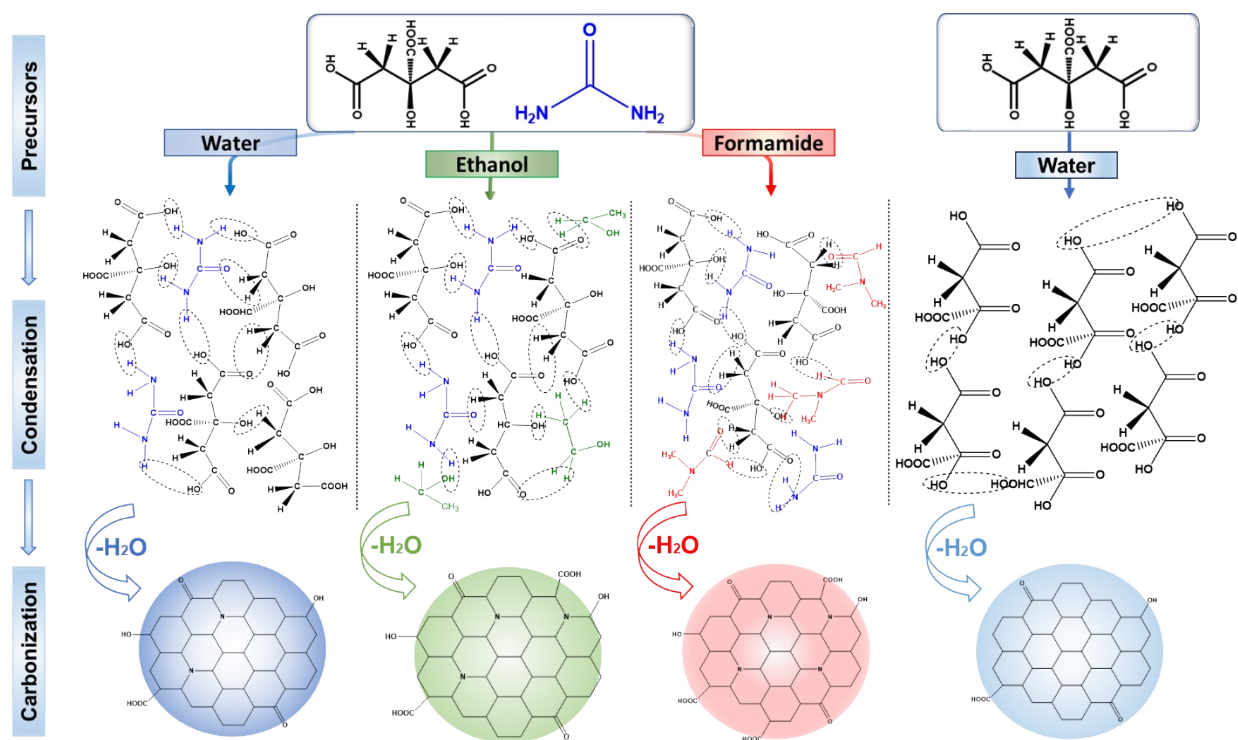

Figure S1. Formation mechanism of W-CQDs, E-CQDs, D-CQDs, and U-CQDs (Left to right) during synthesis. The solvents also contribute to the reaction and form new functional groups.

The reaction is accomplished in three steps: (i) rearrangement of reactants, (ii) condensation reaction to make fluorophores, and (iii) carbonization (top to down).

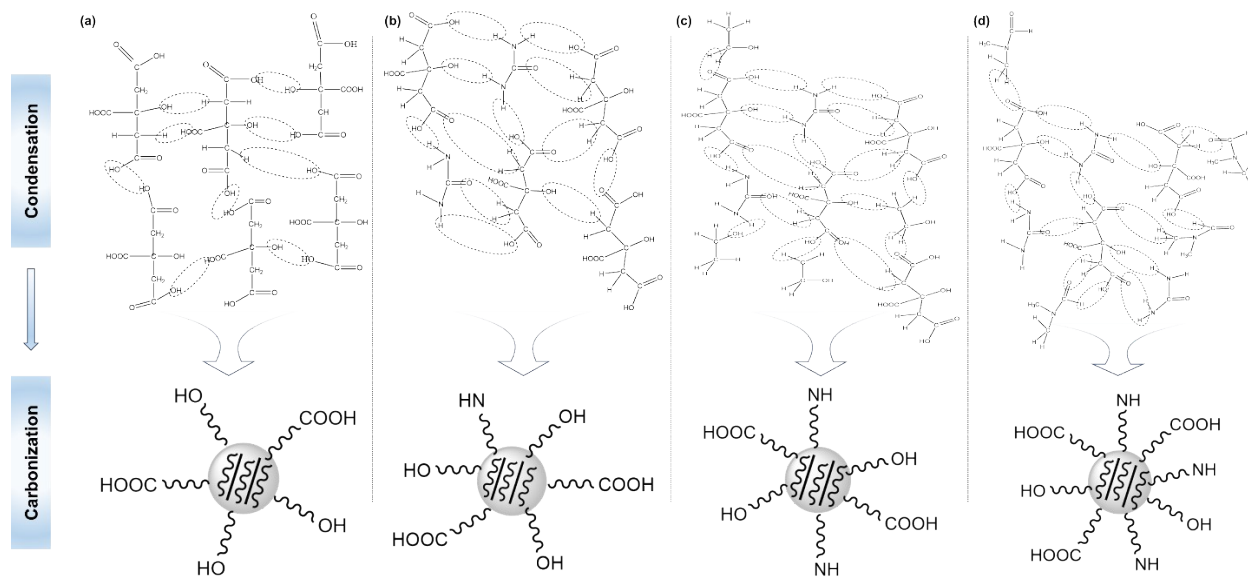

Figure S2. The schematic chemical structures of all synthesized CQDs (a) U-CQDs, (b) W-CQDs, (c) E-CQDs, and (d) D-CQDs.

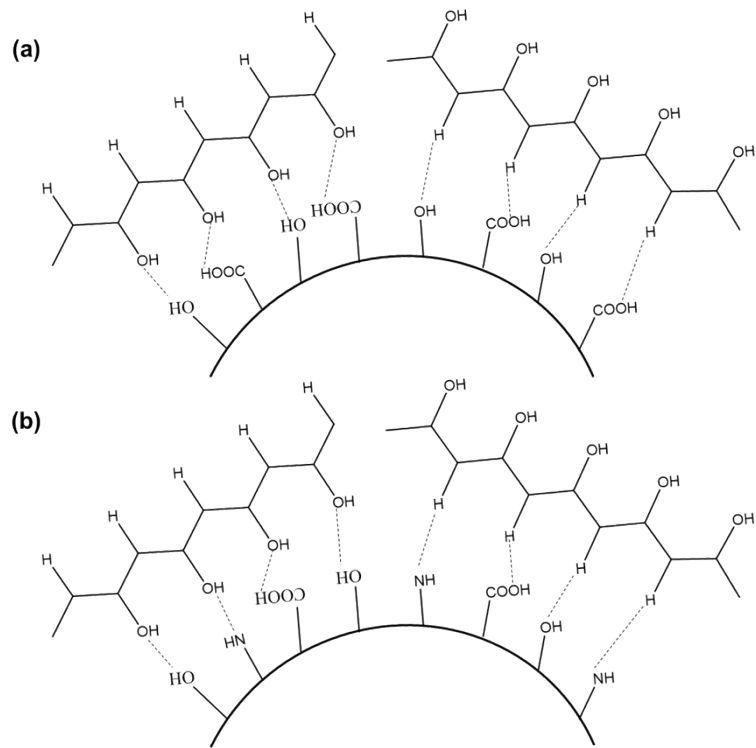

Figure S3. The schematic chemical interactions mechanism of (a) Un-doped CQDs/PVA nanocomposites (b) nitrogen-doped CQDs/PVA nanocomposites.

Table S1. Shows the comparison of average tensile strength of five samples for each sample fabricated using different surface chemistry, size and structure, and the concentration of the CQDs in PVA polymer.

| <b>Sample Name</b>                        | <b>Sample 1</b>                        | <b>Sample 2</b>                        | <b>Sample 3</b>                      | <b>Sample 4</b>                    | <b>Sample 5</b>                     | <b>Average</b>                           |
|-------------------------------------------|----------------------------------------|----------------------------------------|--------------------------------------|------------------------------------|-------------------------------------|------------------------------------------|
| <b>Effect of different surface states</b> |                                        |                                        |                                      |                                    |                                     |                                          |
| <b>PVA+U-CQDs</b>                         | Load:<br>121.1 N<br>Extension:<br>115% | Load:<br>120.9 N<br>Extension:<br>119% | Load:<br>123 N<br>Extension:<br>118% | Load:<br>122<br>Extension:<br>116% | Load:<br>123<br>Extension:<br>117%  | Load:<br>122±1 N<br>Extension:<br>117±1% |
| <b>PVA+W-CQDs</b>                         | Load:<br>90 N<br>Extension:<br>78%     | Load:<br>89 N<br>Extension:<br>76%     | Load:<br>88 N<br>Extension:<br>79%   | Load:<br>91 N<br>Extension:<br>78% | Load:<br>92 N<br>Extension:<br>79%  | Load:<br>90±2 N<br>Extension:<br>78±2%   |
| <b>PVA+E-CQDs</b>                         | Load:<br>63 N<br>Extension:<br>84%     | Load:<br>65 N<br>Extension:<br>82%     | Load:<br>66 N<br>Extension:<br>83%   | Load:<br>65 N<br>Extension:<br>84% | Load:<br>66 N<br>Extension:<br>82%  | Load:<br>65±1 N<br>Extension:<br>83±1%   |
| <b>PVA+D-CQDs</b>                         | Load:<br>99N<br>Extension:<br>75%      | Load:<br>100N<br>Extension:<br>76%     | Load:<br>98N<br>Extension:<br>75%    | Load:<br>102N<br>Extension:<br>78% | Load:<br>101 N<br>Extension:<br>76% | Load:<br>100±2 N<br>Extension:<br>76±2%  |
| <b>Effect of different temperature</b>    |                                        |                                        |                                      |                                    |                                     |                                          |
| <b>PVA+U-CQDs<br/>140 °C</b>              | Load:<br>116 N<br>Extension:<br>76%    | Load:<br>119N<br>Extension:<br>78%     | Load:<br>120 N<br>Extension:<br>81%  | Load:<br>123N<br>Extension:<br>83% | Load:<br>122 N<br>Extension:<br>82% | Load:<br>120±3 N<br>Extension:<br>80±3%  |
| <b>PVA+U-CQDs<br/>180 °C</b>              | Load:<br>150 N                         | Load:<br>148 N                         | Load:<br>149 N                       | Load:<br>152 N                     | Load:<br>151 N                      | Load:<br>150±2 N                         |

|                                           |                    |                    |                    |                    |                    |                      |
|-------------------------------------------|--------------------|--------------------|--------------------|--------------------|--------------------|----------------------|
|                                           | Extension:<br>120% | Extension:<br>119% | Extension:<br>118% | Extension:<br>121% | Extension:<br>122% | Extension:<br>120±2% |
| <b>PVA+U-CQDs<br/>220 °C</b>              | Load:<br>95 N      | Load:<br>100 N     | Load:<br>105 N     | Load:<br>101 N     | Load:<br>99 N      | Load:<br>100±5 N     |
|                                           | Extension:<br>88%  | Extension:<br>90%  | Extension:<br>92%  | Extension:<br>87%  | Extension:<br>93%  | Extension:<br>90±5%  |
| <b>Effect of different concentrations</b> |                    |                    |                    |                    |                    |                      |
| <b>PVA+2% U-<br/>CQDs 180 °C</b>          | Load:<br>120 N     | Load:<br>123 N     | Load:<br>117 N     | Load:<br>121 N     | Load:<br>119 N     | Load:<br>120±3 N     |
|                                           | Extension:<br>113% | Extension:<br>110% | Extension:<br>114% | Extension:<br>113% | Extension:<br>115% | Extension:<br>113±3% |
| <b>PVA+4% U-<br/>CQDs 180 °C</b>          | Load:<br>150 N     | Load:<br>148 N     | Load:<br>149 N     | Load:<br>152 N     | Load:<br>151 N     | Load:<br>150±2 N     |
|                                           | Extension:<br>120% | Extension:<br>119% | Extension:<br>118% | Extension:<br>121% | Extension:<br>122% | Extension:<br>120±2% |
| <b>PVA+6% U-<br/>CQDs 180 °C</b>          | Load:<br>115 N     | Load:<br>119 N     | Load:<br>114 N     | Load:<br>111 N     | Load:<br>116 N     | Load:<br>115±5 N     |
|                                           | Extension:<br>128% | Extension:<br>132% | Extension:<br>129% | Extension:<br>134% | Extension:<br>127% | Extension:<br>130±5% |

Table S2. Shows the comparison of previous works and present work, where degree of polymerization of PVA, CQDs precursors, CQDs synthesis conditions, CQDs concentration, and the mixing method of CQDs were compared. However, the role of CQDs is rarely studied for mechanical reinforcement of PVA.

| <b>Sr.</b> | <b>PVA<br/>Average degree of<br/>polymerization</b> | <b>CQDs<br/>precursors</b>                               | <b>CQDs<br/>synthesis<br/>conditions</b> | <b>CQDs<br/>conc.</b> | <b>CQDs<br/>dispersion</b>              | <b>Ref.</b>     |
|------------|-----------------------------------------------------|----------------------------------------------------------|------------------------------------------|-----------------------|-----------------------------------------|-----------------|
| 1          | 1700                                                | Cellulose<br>fibers,<br>ammonia                          | Temp. 200 °C<br>for 4 h                  | 1 wt.%                | Blending                                | [3]             |
| 2          | 1700                                                | Phenylboronic<br>acid, NaOH,<br>water                    | Temp. 220 °C<br>for 12 h                 | 1 wt.%                | Mechanical<br>mixing                    | [4]             |
| 3          | 2600                                                | Yeast powder,<br>water                                   | Temp. 200 °C<br>for 8 h                  | 2<br>vol.%            | Mechanical<br>mixing                    | [5]             |
| 4          | 2699                                                | Sodium citrate,<br>EDA, water                            | Temp. 160 °C<br>for 8 h                  | 3<br>vol.%            | Mechanical<br>mixing                    | [6]             |
| 5          | 1700 ± 50                                           | Lignocellulose,<br>magnesium<br>hydroxide,<br>EDA, water | Temp. 225 °C<br>for 10 h                 | 1 wt.%                | Mechanical<br>mixing                    | [7]             |
| 6          | 2023 to 2227                                        | Citric acid<br>derived from<br>lemon pulp and<br>water   | Temp. 180 °C<br>for 6 h                  | 4 wt.%                | Sonication<br>and<br>magnetic<br>mixing | Present<br>work |
